# Supplementary material for: Association between Socio-Demographic Factors and Owners’ Beliefs and Attitudes to Pet Cats Fundamental Dietary and Physical Exercise Needs, in City of Belfast
Source: MDPI journal article supplement (doi:10.3390/ani12192645), 2022-10-01
Supplement: s1 [file s1]

# Animas-1807568 Naughton et al. Association between socio-demographic factors and owners' beliefs and attitudes to pet cats fundamental dietary and physical exercise needs, in City of Belfast. Supplementary materials.

**Table S1.** Animals living environment and fundamental management practices, including, feeding practices, monitoring animal body weight and knowledge, and use of Body Condition Score (BCS) reported by the cat owners in this study. A full set of cross-tabulated results.

| Socio-demographic factors evaluated in the study            |                 |                                            |           |          |                           |           |         |                           |          |                           |           |          |         |                           |          |          |          |
|-------------------------------------------------------------|-----------------|--------------------------------------------|-----------|----------|---------------------------|-----------|---------|---------------------------|----------|---------------------------|-----------|----------|---------|---------------------------|----------|----------|----------|
|                                                             | All respondents | Effects of age                             |           |          | Effects of gender         |           |         | Effects of occupation     |          | Effects of education      |           |          |         | Effects of employment     |          |          |          |
|                                                             |                 | 18-25                                      | 26-67     | 67+      | 1F                        | M         | ND      | NR                        | VA       | 1-4                       | 5-6       | 7-8      | ND      | FT                        | PT       | FTE      | UR       |
|                                                             |                 | Cramer's V coefficient (C'sV) <sup>2</sup> |           |          |                           |           |         |                           |          |                           |           |          |         |                           |          |          |          |
|                                                             |                 | P value <sup>3</sup>                       |           |          |                           |           |         |                           |          |                           |           |          |         |                           |          |          |          |
| n (%)                                                       |                 | n (%)                                      |           |          |                           |           |         |                           |          |                           |           |          |         |                           |          |          |          |
| I) Living environment provided to cats                      |                 | C'sV = 0.095<br>P = 0.130                  |           |          | C'sV = 0.107<br>P = 0.060 |           |         | C'sV = 0.190<br>P < 0.001 |          | C'sV = 0.092<br>P = 0.350 |           |          |         | C'sV = 0.121<br>P = 0.071 |          |          |          |
| indoors (no access outdoors)                                | 106(26.6)       | 46(43.4)                                   | 44(41.5)  | 16(15.1) | 52(49.0)                  | 50(47.2)  | 4(3.8)  | 79(74.5)                  | 27(25.5) | 57(53.7)                  | 36(34.0)  | 9(8.5)   | 4(3.8)  | 63(59.4)                  | 18(17.0) | 7(6.6)   | 18(17.0) |
| indoors with a free access to outdoors                      | 258(64.8)       | 78(30.2)                                   | 138(53.5) | 42(16.3) | 167(64.7)                 | 85(33.0)  | 6(2.3)  | 232(89.9)                 | 26(10.1) | 130(50.4)                 | 69(26.7)  | 39(15.1) | 20(7.8) | 107(41.4)                 | 59(22.9) | 25(9.7)  | 67(26.0) |
| outdoors with an access to shelter                          | 34(8.5)         | 9(26.5)                                    | 18(52.9)  | 7(20.6)  | 17(50.0)                  | 16(47.1)  | 1(2.9)  | 28(82.3)                  | 6(17.7)  | 15(44.1)                  | 11(32.3)  | 5(17.7)  | 2(5.9)  | 13(38.2)                  | 7(20.6)  | 5(14.7)  | 9(26.5)  |
| Total                                                       | 398(100)        | 133(33.4)                                  | 200(50.2) | 65(16.3) | 236(59.3)                 | 151(37.9) | 11(2.8) | 339(85.2)                 | 59(14.8) | 202(50.8)                 | 116(29.1) | 54(13.6) | 26(6.5) | 183(46.0)                 | 84(21.1) | 37(13.6) | 94(9.3)  |
| II) Rationale behind daily feeding amount                   |                 | C'sV = 0.136<br>P = 0.144                  |           |          | C'sV = 0.206<br>P < 0.001 |           |         | C'sV = 0.208<br>P = 0.004 |          | C'sV = 0.129<br>P = 0.172 |           |          |         | C'sV = 0.158<br>P = 0.012 |          |          |          |
| fed according to cat appetite                               | 121(30.4)       | 38(31.4)                                   | 56(46.3)  | 27(22.3) | 81(66.9)                  | 38(31.4)  | 2(1.7)  | 110(90.9)                 | 11(9.1)  | 71(58.7)                  | 33(27.3)  | 9(7.4)   | 8(6.6)  | 56(46.3)                  | 16(13.2) | 10(8.3)  | 39(32.2) |
| following the advice from another person (non-professional) | 47(11.8)        | 21(44.7)                                   | 20(42.5)  | 6(12.8)  | 21(44.7)                  | 24(51.0)  | 2(4.3)  | 34(72.3)                  | 13(27.7) | 29(61.7)                  | 12(25.5)  | 5(10.7)  | 1(2.1)  | 26(55.3)                  | 13(27.7) | 3(6.4)   | 5(10.6)  |
| following veterinary advice                                 | 69(17.3)        | 20(29.0)                                   | 36(52.2)  | 13(18.8) | 35(50.7)                  | 32(46.4)  | 2(2.9)  | 58(84.1)                  | 11(15.9) | 32(46.4)                  | 21(30.4)  | 12(17.4) | 4(5.8)  | 32(46.4)                  | 14(20.3) | 5(7.2)   | 18(26.1) |
| following instructions on food packaging                    | 121(30.4)       | 44(36.4)                                   | 65(53.7)  | 12(9.9)  | 79(65.3)                  | 41(33.9)  | 1(0.8)  | 108(89.3)                 | 13(10.7) | 55(45.5)                  | 36(29.7)  | 18(14.9) | 12(9.9) | 49(40.5)                  | 37(30.6) | 13(10.7) | 22(18.2) |
| based on visual inspection of the animal behaviour          | 38(9.5)         | 9(23.7)                                    | 23(60.5)  | 6(15.8)  | 19(50.0)                  | 16(42.1)  | 3(7.9)  | 27(71.1)                  | 11(28.9) | 14(36.9)                  | 13(34.2)  | 10(26.3) | 1(2.6)  | 20(52.6)                  | 4(10.5)  | 5(13.2)  | 9(23.7)  |

|                                                          |           |              |           |              |           |              |         |              |          |              |           |          |         |           |          |          |          |
|----------------------------------------------------------|-----------|--------------|-----------|--------------|-----------|--------------|---------|--------------|----------|--------------|-----------|----------|---------|-----------|----------|----------|----------|
| no answer provided                                       | 2(0.5)    | 1(50.0)      | 0(0.0)    | 1(50.0)      | 1(50.0)   | 0(0.0)       | 1(50.0) | 2(100)       | 0(0.0)   | 1(50.0)      | 1(50.0)   | 0(0.0)   | 0(0.0)  | 0(0.0)    | 0(0.0)   | 1(50.0)  | 1(50.0)  |
| Total                                                    | 398(100)  | 133(33.4)    | 200(50.2) | 65(16.3)     | 236(59.3) | 151(37.9)    | 11(2.8) | 339(85.2)    | 59(14.8) | 202(50.8)    | 116(29.1) | 54(13.6) | 26(6.5) | 183(46.0) | 84(21.1) | 37(13.6) | 94(9.3)  |
| <b>III) Frequency of monitoring animal body weight</b>   |           | C'sV = 0.105 |           | C'sV = 0.122 |           | C'sV = 0.295 |         | C'sV = 0.156 |          | C'sV = 0.107 |           |          |         |           |          |          |          |
|                                                          |           | P = 0.067    |           | P = 0.019    |           | P < 0.001    |         | P = 0.004    |          | P = 0.164    |           |          |         |           |          |          |          |
| every 3-6 months                                         | 91(22.9)  | 35(38.4)     | 39(42.9)  | 17(18.7)     | 57(62.6)  | 29(31.9)     | 5(5.5)  | 60(65.9)     | 31(34.1) | 46(50.5)     | 29(31.9)  | 15(16.5) | 1(1.1)  | 49(53.8)  | 14(15.4) | 8(8.8)   | 20(22.0) |
| once a year                                              | 116(29.1) | 36(31.0)     | 69(59.5)  | 11(9.5)      | 78(67.2)  | 35(30.2)     | 3(2.6)  | 105(90.5)    | 11(9.5)  | 44(37.9)     | 43(37.1)  | 19(16.4) | 10(8.6) | 54(46.6)  | 28(24.1) | 14(12.1) | 20(17.2) |
| I don't monitor                                          | 191(48.0) | 62(32.4)     | 92(48.2)  | 37(19.4)     | 101(52.9) | 87(45.5)     | 3(1.6)  | 174(91.1)    | 17(8.9)  | 112(58.6)    | 44(23.0)  | 20(10.5) | 15(7.9) | 80(41.9)  | 42(22.0) | 15(7.8)  | 54(28.3) |
| Total                                                    | 398(100)  | 133(33.4)    | 200(50.2) | 65(16.3)     | 236(59.3) | 151(37.9)    | 11(2.8) | 339(85.2)    | 59(14.8) | 202(50.8)    | 116(29.1) | 54(13.6) | 26(6.5) | 183(50.8) | 84(29.1) | 37(13.6) | 94(6.5)  |
| <b>IV) Body Condition Score (BCS): knowledge and use</b> |           | C'sV = 0.144 |           | C'sV = 0.174 |           | C'sV = 0.396 |         | C'sV = 0.141 |          | C'sV = 0.135 |           |          |         |           |          |          |          |
|                                                          |           | P = 0.036    |           | P = 0.002    |           | P < 0.001    |         | P = 0.021    |          | P = 0.040    |           |          |         |           |          |          |          |
| I know BCS and use it                                    | 65(16.3)  | 33(50.8)     | 21(32.3)  | 11(16.9)     | 42(64.6)  | 18(27.7)     | 5(7.7)  | 36 (55.4)    | 29(44.6) | 22(33.9)     | 26(40.0)  | 16(24.6) | 1(1.5)  | 33(50.8)  | 8(12.3)  | 13(20.0) | 11(16.9) |
| I know of BCS, but not sure how to use it                | 74(18.6)  | 26(35.1)     | 35(47.3)  | 13(17.6)     | 32(43.2)  | 39(52.7)     | 3(4.1)  | 65 (87.8)    | 9(12.2)  | 40(54.1)     | 24(32.4)  | 7(9.5)   | 3(4.0)  | 38(51.4)  | 14(18.9) | 8(10.8)  | 14(18.9) |
| I am vaguely familiar with BCS thus I do not use it      | 35(8.8)   | 9(25.7)      | 19(54.3)  | 7(20.0)      | 27(77.1)  | 8(22.9)      | 0(0.0)  | 31(88.6)     | 4(11.4)  | 21(60.0)     | 8(22.9)   | 5(14.2)  | 1(2.9)  | 12(34.3)  | 8(22.8)  | 3(8.6)   | 12(34.3) |
| I do not know and do not use BCS                         | 224(56.3) | 65(28.7)     | 125(56.0) | 34(15.3)     | 135(60.5) | 86(38.1)     | 3(1.4)  | 207(92.8)    | 17(7.2)  | 119(52.9)    | 58(26.0)  | 26(11.7) | 21(9.4) | 100(44.4) | 54(24.2) | 13(5.8)  | 57(25.6) |
| Total                                                    | 398(100)  | 133(33.4)    | 200(50.2) | 65(16.3)     | 236(59.3) | 151(37.9)    | 11(2.8) | 339(85.2)    | 59(14.8) | 202(50.8)    | 116(29.1) | 54(13.6) | 26(6.5) | 183(50.8) | 84(29.1) | 37(13.6) | 94(6.5)  |

<sup>1</sup>F= Female; M=Male; ND=Not disclosed; NR=Not related to veterinary or animal sci.; VA= Veterinary, and animal sci. related; 1-4=ISCED 2011 level 1-4; 5-6=ISCED 2011 level 5-6; 7-8=ISCED 2011 level 7-8; ND=Not disclosed; FT=Employment status - Full-time; PT=Employment status - Part-time; FTE= Full time education; UR= Unemployed, retired, or otherwise at home and not working.

<sup>2</sup>Cramer's V coefficients (C'sV) show the level of associations between respondents' opinions and the sociodemographic ordinal variables listed in the table columns. C'sV between 0.100-0.150 indicate moderate while C'sV between 0.151-0.250 indicate strong association [17].

<sup>3</sup>P values for Pearson's chi-square tests or those for Fisher Freeman Hilton exact test for the data-subsets of smaller sample size according to Cochran condition.

**Table S2.** Owners attitude of cats dietary preferences, needs and the drivers of shopping for cat food. A full set of cross-tabulated results.

| <i>Socio-demographic factors evaluated in the study</i> |                       |       |     |                          |   |    |                              |    |     |                             |     |    |                              |    |     |    |  |
|---------------------------------------------------------|-----------------------|-------|-----|--------------------------|---|----|------------------------------|----|-----|-----------------------------|-----|----|------------------------------|----|-----|----|--|
| Responses <sup>1</sup>                                  | <i>Effects of age</i> |       |     | <i>Effects of gender</i> |   |    | <i>Effects of occupation</i> |    |     | <i>Effects of education</i> |     |    | <i>Effects of employment</i> |    |     |    |  |
|                                                         | 18-25                 | 26-67 | 67+ | <sup>2</sup> F           | M | ND | NR                           | VA | 1-4 | 5-6                         | 7-8 | ND | FT                           | PT | FTE | UR |  |

|                                                                                     |                                |    |           | Cramer's V coefficient (C'sV) <sup>3</sup> |           |          |              |           |         |              |          |           |              |          |         |              |          |          |          |
|-------------------------------------------------------------------------------------|--------------------------------|----|-----------|--------------------------------------------|-----------|----------|--------------|-----------|---------|--------------|----------|-----------|--------------|----------|---------|--------------|----------|----------|----------|
| n (%)                                                                               |                                |    |           | P value <sup>4</sup>                       |           |          |              |           |         |              |          |           |              |          |         |              |          |          |          |
|                                                                                     |                                |    |           | n (%)                                      |           |          |              |           |         |              |          |           |              |          |         |              |          |          |          |
| Owners perception of their animal(s) food preferences: I think that...              |                                |    |           |                                            |           |          |              |           |         |              |          |           |              |          |         |              |          |          |          |
|                                                                                     |                                |    |           | C'sV = 0.091                               |           |          | C'sV = 0.071 |           |         | C'sV = 0.130 |          |           | C'sV = 0.161 |          |         | C'sV = 0.175 |          |          |          |
|                                                                                     |                                |    |           | P = 0.763                                  |           |          | P = 0.673    |           |         | P = 0.077    |          |           | P = 0.306    |          |         | P = 0.184    |          |          |          |
| 1                                                                                   | ...my cat(s) are happier being | NA | 105(26.4) | 39(37.1)                                   | 49(46.7)  | 17(16.2) | 62(59.0)     | 40(38.1)  | 3(2.9)  | 83(79.1)     | 22(20.9) | 42(40.0)  | 35(33.3)     | 19(18.1) | 9(8.6)  | 56(53.3)     | 22(21.0) | 8(7.6)   | 19(18.1) |
|                                                                                     | fed human foods such as fresh  | DF | 77(19.3)  | 21(27.3)                                   | 43(55.8)  | 13(16.9) | 41(53.2)     | 34(44.2)  | 2(2.6)  | 67(87.0)     | 10(13.0) | 44(57.1)  | 19(24.7)     | 11(14.3) | 3(3.9)  | 37(48.0)     | 17(22.1) | 5(6.5)   | 18(23.4) |
|                                                                                     | meat or milk or table foods    | VM | 163(41.0) | 57(34.9)                                   | 78(47.9)  | 28(17.2) | 101(62.0)    | 56(34.3)  | 6(3.7)  | 139(85.3)    | 24(14.7) | 87(53.4)  | 45(27.6)     | 21(12.9) | 10(6.1) | 66(40.5)     | 30(18.4) | 22(13.5) | 45(27.6) |
|                                                                                     |                                | NS | 53(13.3)  | 16(30.2)                                   | 30(56.6)  | 7(13.2)  | 32(60.4)     | 21(39.6)  | 0(0.0)  | 50(94.3)     | 3(5.7)   | 29(54.7)  | 17(32.1)     | 3(5.7)   | 4(7.5)  | 24(45.3)     | 15(28.3) | 2(3.8)   | 12(22.6) |
|                                                                                     | Total                          |    | 398(100)  | 133(33.4)                                  | 200(50.3) | 65(16.3) | 236(59.3)    | 151(37.9) | 11(2.8) | 339(85.2)    | 59(14.8) | 202(50.8) | 116(29.1)    | 54(13.6) | 26(6.5) | 183(46.0)    | 84(21.1) | 37(13.6) | 94(9.3)  |
|                                                                                     |                                |    |           | C'sV = 0.153                               |           |          | C'sV = 0.075 |           |         | C'sV = 0.105 |          |           | C'sV = 0.133 |          |         | C'sV = 0.161 |          |          |          |
|                                                                                     |                                |    |           | P = 0.147                                  |           |          | P = 0.895    |           |         | P = 0.221    |          |           | P = 0.617    |          |         | P = 0.307    |          |          |          |
| 2                                                                                   | ...my cat(s) are happier being | NA | 91(22.9)  | 35 (38.5)                                  | 42(46.1)  | 14(15.4) | 59(64.8)     | 30(33.0)  | 2(2.2)  | 77(84.6)     | 14(15.4) | 39(42.8)  | 28(30.8)     | 15(16.5) | 9(9.9)  | 40(43.9)     | 22(24.2) | 8(8.8)   | 21(23.1) |
|                                                                                     | fed dry commercial food        | DF | 132(33.2) | 52(39.4)                                   | 62(47.0)  | 18(13.6) | 73(55.3)     | 55(41.7)  | 4(3.0)  | 110(83.3)    | 22(16.7) | 69(52.3)  | 43(32.6)     | 13(9.8)  | 7(5.3)  | 64(48.5)     | 30(22.7) | 16(12.1) | 22(16.7) |
|                                                                                     |                                | VM | 130(32.7) | 33(25.4)                                   | 75(57.7)  | 22(16.9) | 78(60.0)     | 48(36.9)  | 4(3.1)  | 109(83.8)    | 21(16.2) | 71(54.6)  | 33(25.4)     | 19(14.6) | 7(5.4)  | 58(44.6)     | 24(18.5) | 12(9.2)  | 36(27.7) |
|                                                                                     |                                | NS | 45(11.3)  | 13(28.9)                                   | 21(46.7)  | 11(24.4) | 26(57.8)     | 18(40.0)  | 1(2.2)  | 43(95.6)     | 2(4.4)   | 23(51.1)  | 12(26.7)     | 7(15.5)  | 3(6.7)  | 21(46.7)     | 8(17.8)  | 1(2.2)   | 15(33.3) |
|                                                                                     | Total                          |    | 398(100)  | 133(33.4)                                  | 200(50.3) | 65(16.3) | 236(59.3)    | 151(37.9) | 11(2.8) | 339(85.2)    | 59(14.8) | 202(50.8) | 116(29.1)    | 54(13.6) | 26(6.5) | 183(46.0)    | 84(21.1) | 37(13.6) | 94(9.3)  |
|                                                                                     |                                |    |           | C'sV = 0.095                               |           |          | C'sV = 0.081 |           |         | C'sV = 0.115 |          |           | C'sV = 0.168 |          |         | C'sV = 0.159 |          |          |          |
|                                                                                     |                                |    |           | P = 0.311                                  |           |          | P = 0.517    |           |         | P = 0.150    |          |           | P = 0.239    |          |         | P = 0.329    |          |          |          |
| 3                                                                                   | ...my cat(s) are happier being | NA | 41(10.63) | 15 (36.6)                                  | 19(46.3)  | 7(17.1)  | 22(53.7)     | 18(43.9)  | 1(2.4)  | 33(80.5)     | 8(19.5)  | 22(53.7)  | 14(34.1)     | 1(2.4)   | 4(9.8)  | 21(51.2)     | 8(19.5)  | 4(9.8)   | 8(19.5)  |
|                                                                                     | fed wet commercial food        | DF | 86(21.6)  | 22(25.6)                                   | 44(51.2)  | 20(23.3) | 44(51.1)     | 39(45.3)  | 3(3.5)  | 70(81.4)     | 16(18.6) | 49(57.0)  | 23(26.8)     | 7(8.1)   | 7(8.1)  | 44(51.2)     | 14(16.3) | 5(5.8)   | 23(26.7) |
|                                                                                     |                                | VM | 235(59.0) | 86(36.6)                                   | 118(50.2) | 31(13.2) | 150(63.8)    | 79(33.6)  | 6(2.6)  | 208(88.5)    | 27(11.5) | 112(47.7) | 69(29.3)     | 40(17.0) | 14(6.0) | 104(44.2)    | 54(23.0) | 27(11.5) | 50(21.3) |
|                                                                                     |                                | NS | 36(9.0)   | 10(27.8)                                   | 19(52.8)  | 7(19.4)  | 20(55.5)     | 15(41.7)  | 1(2.8)  | 28(77.8)     | 8(22.2)  | 19(52.8)  | 10(27.8)     | 6(16.6)  | 1(2.8)  | 14(38.9)     | 8(22.2)  | 1(2.8)   | 13(36.1) |
|                                                                                     | Total                          |    | 398(100)  | 133(33.4)                                  | 200(50.3) | 65(16.3) | 236(59.3)    | 151(37.9) | 11(2.8) | 339(85.2)    | 59(14.8) | 202(50.8) | 116(29.1)    | 54(13.6) | 26(6.5) | 183(46.0)    | 84(21.1) | 37(13.6) | 94(9.3)  |
| Owners perception of an expression of care towards their animal(s): I think that... |                                |    |           |                                            |           |          |              |           |         |              |          |           |              |          |         |              |          |          |          |

|   |                                  |    |           | C'sV = 0.094                 | C'sV = 0.101                | C'sV = 0.143       | C'sV = 0.084                         | C'sV = 0.093                        |
|---|----------------------------------|----|-----------|------------------------------|-----------------------------|--------------------|--------------------------------------|-------------------------------------|
|   |                                  |    |           | P = 0.734                    | P = 0.225                   | P = 0.043          | P = 0.499                            | P = 0.323                           |
| 1 | ...my cat(s) want food when it   | NA | 73(18.3)  | 24(32.9) 40(54.8) 9(12.3)    | 51(69.9) 20(27.4) 2(2.7)    | 56(76.7) 17(23.3)  | 30(41.1) 24(32.9) 15(20.5) 4(5.5)    | 41(56.2) 12(16.4) 7(9.6) 13(17.8)   |
|   | approaches me e.g., with tail up | DF | 84(21.1)  | 30(35.7) 37(44.1) 17(20.2)   | 43(51.2) 38(45.2) 3(3.6)    | 72(85.7) 12(14.3)  | 46(54.8) 24(28.6) 9(10.7) 5(5.9)     | 38(45.3) 20(23.8) 9(10.7) 17(20.2)  |
|   | or brushing against me           | VM | 171(43.0) | 59(34.5) 86(50.3) 26(15.2)   | 98(57.3) 70(40.9) 3(1.8)    | 154(90.1) 17(9.9)  | 87(50.9) 52(30.4) 22(12.9) 10(5.8)   | 71(41.5) 38(22.2) 19(11.1) 43(25.2) |
|   |                                  | NS | 70(17.6)  | 20(28.6) 37(52.9) 13 (18.6)  | 44(62.9) 23(32.9) 3(4.2)    | 57(81.4) 13(18.6)  | 39(55.7) 16(22.9) 8(11.4) 7(10.0)    | 33(47.1) 14(20.0) 2(2.9) 21(30.0)   |
|   | Total                            |    | 398(100)  | 133(33.4) 200(50.3) 65(16.3) | 236(59.3) 151(37.9) 11(2.8) | 339(85.2) 59(14.8) | 202(50.8) 116(29.1) 54(13.6) 26(6.5) | 183(46.0) 84(21.1) 37(13.6) 94(9.3) |
|   |                                  |    |           | C'sV = 0.087                 | C'sV = 0.108                | C'sV = 0.091       | C'sV = 0.102                         | C'sV = 0.072                        |
|   |                                  |    |           | P = 0.427                    | P = 0.158                   | P = 0.351          | P = 0.186                            | P = 0.720                           |
| 2 | ...it is important to give       | NA | 111(27.9) | 32(28.8) 55(49.6) 24(21.6)   | 66(59.5) 42(37.8) 3(2.7)    | 89(80.2) 22(19.8)  | 45(40.6) 35(31.5) 19(17.1) 12(10.8)  | 47(42.4) 22(19.8) 13(11.7) 29(26.1) |
|   | food/treats to my cat(s) to show | DF | 114(28.6) | 35(30.7) 62(54.4) 17(14.9)   | 63(55.2) 50(43.9) 1(0.9)    | 98(86.0) 16(14.0)  | 69(60.5) 27(23.7) 14(12.3) 4(3.5)    | 53(46.5) 29(25.5) 7(6.1) 25(21.9)   |
|   | how much I care                  | VM | 127(31.9) | 49(38.6) 59(46.4) 19(15.0)   | 75(59.1) 45(35.4) 7(5.5)    | 112(88.2) 15(11.8) | 64(50.4) 40(31.5) 16(12.6) 7(5.5)    | 57(44.9) 26(20.5) 13(10.2) 31(24.4) |
|   |                                  | NS | 46(11.6)  | 17(37.0) 24(52.2) 5(10.8)    | 32(69.6) 14(30.4) 0(0.0)    | 40(87.0) 6(13.0)   | 24(52.2) 14(30.4) 5(10.9) 3(6.5)     | 26(56.5) 7(15.2) 4(8.7) 9(19.6)     |
|   | Total                            |    | 398(100)  | 133(33.4) 200(50.3) 65(16.3) | 236(59.3) 151(37.9) 11(2.8) | 339(85.2) 59(14.8) | 202(50.8) 116(29.1) 54(13.6) 26(6.5) | 183(46.0) 84(21.1) 37(13.6) 94(9.3) |

**Owners perception of their animal(s) dietary needs: I think that...**

|   |                                  |    |           | C'sV = 0.154                 | C'sV = 0.246                | C'sV = 0.240       | C'sV = 0.166                         | C'sV = 0.060                         |
|---|----------------------------------|----|-----------|------------------------------|-----------------------------|--------------------|--------------------------------------|--------------------------------------|
|   |                                  |    |           | P = 0.138                    | P < 0.001                   | P < 0.001          | P = 0.253                            | P = 0.886                            |
| 1 | ...food wise, my cat(s) gets     | NA | 20(5.0)   | 7(35.0) 7(35.0) 6(30.0)      | 14(70.0) 6(30.0) 0(0.0)     | 11(55.0) 9(45.0)   | 8(40.0) 7(35.0) 3(15.0) 2(10.0)      | 11(55.0) 3(15.0) 2(10.0) 4(20.0)     |
|   | what it needs for its age/body   | DF | 39(9.8)   | 19(48.7) 14(35.9) 6(15.4)    | 11(28.2) 27(69.2) 1(2.6)    | 28(71.8) 11(28.2)  | 20(51.3) 15(38.5) 0(0.0) 4(10.2)     | 21(53.8) 9(23.1) 1(2.6) 8(20.5)      |
|   | condition and health             | VM | 309(77.6) | 96(31.1) 166(53.7) 47(15.2)  | 192(62.1) 110(35.6) 7(2.3)  | 274(88.7) 35(11.3) | 156(50.5) 89(28.8) 46(14.9) 18(5.8)  | 136(44.0) 66(21.4) 31(10.0) 76(24.6) |
|   |                                  | NS | 30(7.5)   | 11(36.7) 13(43.3) 6(20.0)    | 19(63.3) 8(26.7) 3(10.0)    | 26(86.7) 4(13.3)   | 18(60.0) 5(16.7) 5(16.7) 2(6.6)      | 15(50.0) 6(20.0) 3(10.0) 6(20.0)     |
|   | Total                            |    | 398(100)  | 133(33.4) 200(50.3) 65(16.3) | 236(59.3) 151(37.9) 11(2.8) | 339(85.2) 59(14.8) | 202(50.8) 116(29.1) 54(13.6) 26(6.5) | 183(46.0) 84(21.1) 37(13.6) 94(9.3)  |
|   |                                  |    |           | C'sV = 0.094                 | C'sV = 0.079                | C'sV = 0.099       | C'sV = 0.081                         | C'sV = 0.128                         |
|   |                                  |    |           | P = 0.317                    | P = 0.540                   | P = 0.273          | P = 0.550                            | P = 0.020                            |
| 2 | ...my cat(s) are being fed by    | NA | 109(27.4) | 42(38.5) 51(46.8) 16(14.7)   | 65(59.6) 41(37.6) 3(2.8)    | 93(85.3) 16(14.7)  | 54(49.5) 31(28.5) 19(17.4) 5(4.6)    | 52(47.7) 32(29.3) 10(9.2) 15(13.8)   |
|   | neighbours or is/are hunting, so | DF | 102(25.6) | 31(30.4) 49(48.0) 22(21.6)   | 57(55.9) 43(42.1) 2(2.0)    | 83(81.4) 19(18.6)  | 54(52.9) 29(28.4) 13(12.8) 6(5.9)    | 51(50.0) 12(11.8) 9(8.8) 30(29.4)    |

|                                 |       |           |                              |                             |                    |                                      |                                     |
|---------------------------------|-------|-----------|------------------------------|-----------------------------|--------------------|--------------------------------------|-------------------------------------|
| they are getting more food than | VM    | 105(26.4) | 39(37.2) 52(49.5) 14(13.3)   | 59(56.2) 41(39.0) 5(4.8)    | 88(83.8) 17(16.2)  | 47(44.8) 35(33.3) 12(11.4) 11(10.5)  | 44(41.9) 25(23.8) 13(12.4) 23(21.9) |
| I give them                     | NS    | 82(20.6)  | 21(25.6) 48(58.5) 13(15.9)   | 55(67.1) 26(31.7) 1(1.2)    | 75(91.5) 7(8.5)    | 47(57.3) 21(25.6) 10(12.2) 4(4.9)    | 36(43.9) 15(18.3) 5(6.1) 26(31.7)   |
|                                 | Total | 398(100)  | 133(33.4) 200(50.3) 65(16.3) | 236(59.3) 151(37.9) 11(2.8) | 339(85.2) 59(14.8) | 202(50.8) 116(29.1) 54(13.6) 26(6.5) | 183(46.0) 84(21.1) 37(13.6) 94(9.3) |

Owners motivation regarding their choices of purchasing commercial food for their cat(s): I buy cat food primarily ...

|   |                                                       |       |           | C'sV = 0.094                   | C'sV = 0.113                | C'sV = 0.048       | C'sV = 0.105                         | C'sV = 0.072                         |
|---|-------------------------------------------------------|-------|-----------|--------------------------------|-----------------------------|--------------------|--------------------------------------|--------------------------------------|
|   |                                                       |       |           | P = 0.324                      | P = 0.115                   | P = 0.823          | P = 0.161                            | P = 0.722                            |
| 1 | ...considering price                                  | NA    | 167(42.0) | 47(28.1) 91(54.5) 29(17.4)     | 109(65.3) 56(33.5) 2(1.2)   | 144(86.2) 23(13.8) | 69(41.3) 54(32.3) 31(18.6) 13(7.8)   | 83(49.7) 34(20.3) 13(7.8) 37(22.2)   |
|   |                                                       | DF    | 96(24.1)  | 32(33.3) 51(53.1) 13(13.6)     | 50(52.1) 44(45.8) 2(2.1)    | 81(84.4) 15(15.6)  | 55(57.3) 27(28.1) 10(10.4) 4(4.2)    | 43(44.8) 23(24.0) 10(10.4) 20(20.8)  |
|   |                                                       | VM    | 107(26.9) | 42(39.2) 45(42.1) 20(18.7)     | 63(58.9) 38(35.5) 6(5.6)    | 89(83.2) 18(16.8)  | 61(57.0) 29(27.1) 10(9.4) 7(6.5)     | 45(42.1) 22(20.5) 9(8.4) 31(29.0)    |
|   |                                                       | NS    | 28(7.0)   | 12(42.9) 13(46.4) 3(10.7)      | 14(50.0) 13(46.4) 1(3.6)    | 25(89.3) 3(10.7)   | 17(60.7) 6(21.4) 3(10.7) 2(7.2)      | 12(42.8) 5(17.9) 5(17.9) 6(21.4)     |
|   |                                                       | Total | 398(100)  | 133(33.4) 200(50.3) 65(16.3)   | 236(59.3) 151(37.9) 11(2.8) | 339(85.2) 59(14.8) | 202(50.8) 116(29.1) 54(13.6) 26(6.5) | 183(46.0) 84(21.1) 37(13.6) 94(9.3)  |
|   |                                                       |       |           | C'sV = 0.148                   | C'sV = 0.244 P < 0.001      | C'sV = 0.175       | C'sV =0.146                          | C'sV = 0.099                         |
|   |                                                       |       |           | P = 0.008                      |                             | P = 0.006          | P = 0.466                            | P = 0.915                            |
| 2 | ...considering what (s)he likes to eat                | NA    | 58(14.6)  | 17(29.3) 28(48.3) 13(22.4)     | 31(53.4) 24(31.4) 3(5.2)    | 48(82.8) 10(17.2)  | 27(46.6) 19(32.8) 6(10.3) 6(10.3)    | 29(50.0) 9(15.5) 5(8.6) 15(25.9)     |
|   |                                                       | DF    | 68(17.1)  | 31(45.6) 23(33.8) 14(20.6)     | 28(41.2) 35(51.5) 5(7.3)    | 53(77.9) 15(22.1)  | 37(54.4) 22(32.4) 7(10.3) 2(2.9)     | 30(44.1) 17(25.0) 4(5.9) 17(25.0)    |
|   |                                                       | VM    | 247(62.1) | 72(29.1) 138(55.9) 37(15.0)    | 166(67.2) 78(31.6) 3(1.2)   | 221(89.5) 26(10.5) | 123(49.8) 67(27.1) 39(15.8) 18(7.3)  | 111(44.9) 53(21.5) 25(10.1) 58(23.5) |
|   |                                                       | NS    | 25(6.3)   | 13(52.0) 11(44.0) 1(4.0)       | 11(44.0) 14(56.0) 0(0.0)    | 17(68.0) 8(32.0)   | 15(60.0) 8(32.0) 2(8.0) 0(0.0)       | 13(52.0) 5(20.0) 3(12.0) 4(16.0)     |
|   |                                                       | Total | 398(100)  | 133(33.4) 200(50.3) 65(16.3)   | 236(59.3) 151(37.9) 11(2.8) | 339(85.2) 59(14.8) | 202(50.8) 116(29.1) 54(13.6) 26(6.5) | 183(46.0) 84(21.1) 37(13.6) 94(9.3)  |
|   |                                                       |       |           | C'sV = 0.051                   | C'sV = 0.102                | C'sV = 0.125       | C'sV = 0.112                         | C'sV = 0.116                         |
|   |                                                       |       |           | P = 0.910                      | P = 0.222                   | P = 0.103          | P = 0.096                            | P = 0.067                            |
| 3 | ...considering what is available in the shops I go to | NA    | 145(36.4) | 47(32.4) 77(53.1)21(14.5)      | 84(57.9) 60(41.4) 1(0.7)    | 122(84.1) 23(15.9) | 60(41.4) 46(31.7) 26(17.9) 13(9.0)   | 75(51.7) 30(20.7) 11(7.6) 29(20.0)   |
|   |                                                       | DF    | 114(28.6) | 37(32.5) 59(51.7) 18(15.8)     | 70(61.4) 41(36.0) 3(2.6)    | 91(79.8) 23(20.2)  | 57(50.0) 34(29.8) 16(14.1) 7(6.1)    | 53(49.4) 24(21.1) 13(11.4) 24(21.1)  |
|   |                                                       | VM    | 122(30.7) | 42(34.4) 57(46.7) 23(18.9)     | 73(59.9) 42(34.4) 7(5.7)    | 110(90.2) 12(9.8)  | 75(61.5) 32(26.2) 9(7.4) 6(4.9)      | 44(36.1) 30(24.6) 10(8.2) 38(31.1)   |
|   |                                                       | NS    | 17(4.3)   | 7(41.2) 7(41.2) 3(17.6)        | 9(52.9) 8(47.1) 0(0.0)      | 16(94.1) 1(5.9)    | 10(58.8) 4(23.5) 3(17.7) 0(0.0)      | 11(64.8) 0(0.0) 3(17.6) 3(17.6)      |
|   |                                                       | Total | 398(100)  | 133(33.4) 200(50.3) 65(16.3) ) | 236(59.3) 151(37.9) 11(2.8) | 339(85.2) 59(14.8) | 202(50.8) 116(29.1) 54(13.6) 26(6.5) | 183(46.0) 84(21.1) 37(13.6) 94(9.3)  |

|   |                                     |       |           | C'sV = 0.175 |           |          | C'sV = 0.202 |           |         | C'sV = 0.171 |          |           | C'sV = 0.134 |          |         |           | C'sV = 0.149 |          |          |  |
|---|-------------------------------------|-------|-----------|--------------|-----------|----------|--------------|-----------|---------|--------------|----------|-----------|--------------|----------|---------|-----------|--------------|----------|----------|--|
|   |                                     |       |           | P<0.001      |           |          | P = 0.009    |           |         | P = 0.007    |          |           | P = 0.608    |          |         |           | P = 0.466    |          |          |  |
| 4 | ...considering the health of my cat | NA    | 68(17.1)  | 30(44.2)     | 19(27.9)  | 19(27.9) | 29(42.7)     | 36(52.9)  | 3(4.4)  | 49(72.1)     | 19(27.9) | 30(44.1)  | 23(33.8)     | 9(13.3)  | 6(8.8)  | 36(52.9)  | 15(22.1)     | 2(2.9)   | 15(22.1) |  |
|   |                                     | DF    | 62(15.6)  | 27(43.5)     | 29(46.8)  | 6(9.7)   | 33(53.2)     | 26(41.9)  | 3(4.9)  | 56(90.3)     | 6(9.7)   | 32(51.6)  | 21(33.9)     | 7(11.3)  | 2(3.2)  | 26(42.0)  | 10(16.1)     | 10(16.1) | 16(25.8) |  |
|   |                                     | VM    | 232(58.3) | 64(27.6)     | 131(56.5) | 37(15.9) | 155(66.8)    | 72(31.0)  | 5(2.2)  | 204(87.9)    | 28(12.1) | 119(51.3) | 62(26.7)     | 33(14.2) | 18(7.8) | 103(44.4) | 51(22.0)     | 23(9.9)  | 55(23.7) |  |
|   |                                     | NS    | 36(9.0)   | 12(33.3)     | 21(58.4)  | 3(8.3)   | 19(52.8)     | 17(47.2)  | 0(0.0)  | 30(83.3)     | 6(16.7)  | 21(58.3)  | 10(27.8)     | 5(13.9)  | 0(0.0)  | 18(50.0)  | 8(22.2)      | 2(5.6)   | 8(22.2)  |  |
|   |                                     | Total | 398(100)  | 133(33.4)    | 200(50.3) | 65(16.3) | 236(59.3)    | 151(37.9) | 11(2.8) | 339(85.2)    | 59(14.8) | 202(50.8) | 116(29.1)    | 54(13.6) | 26(6.5) | 183(46.0) | 84(21.1)     | 37(13.6) | 94(9.3)  |  |

<sup>1</sup> NA=Not at all; DF=Doubt-fully; VM=Very much so; NS=Not sure; <sup>2</sup>Cramer's V coefficients (C'sV) show the level of associations between respondents' opinions and the sociodemographic ordinal variables listed in the table columns. C'sV between 0.100-0.150 indicate moderate while C'sV between 0.151-0.250 indicate strong association [17].

<sup>3</sup>F= Female; M=Male; ND=Not disclosed; NR=Not related to veterinary or animal sci.; VA= Veterinary, and animal sci. related; 1-4=ISCED 2011 level 1-4; 5-6=ISCED 2011 level 5-6; 7-8=ISCED 2011 level 7-8; ND=Not disclosed; FT=Employment status - Full-time; PT=Employment status - Part-time; FTE= Full time education; UR= Unemployed, retired, or otherwise at home and not working.

<sup>3</sup>P values for Pearson's chi-square tests or those for Fisher Freeman Hilton exact test for the data-subsets of smaller sample size according to Cochran's condition.

**Table S3.** Owners' perceptions of their cats' needs and satisfaction. *A full set of cross-tabulated results.*

| Socio-demographic factors evaluated in the study           |                                                        |    |           |                                            |           |          |                   |           |        |                       |          |                      |           |          |                       |          |          |          |          |
|------------------------------------------------------------|--------------------------------------------------------|----|-----------|--------------------------------------------|-----------|----------|-------------------|-----------|--------|-----------------------|----------|----------------------|-----------|----------|-----------------------|----------|----------|----------|----------|
| Responses <sup>1</sup>                                     |                                                        |    |           | Effects of age                             |           |          | Effects of gender |           |        | Effects of occupation |          | Effects of education |           |          | Effects of employment |          |          |          |          |
|                                                            |                                                        |    |           | 18-25                                      | 26-67     | 67+      | <sup>2</sup> F    | M         | ND     | NR                    | VA       | 1-4                  | 5-6       | 7-8      | ND                    | FT       | PT       | FTE      | UR       |
|                                                            |                                                        |    |           | Cramer's V coefficient (C'sV) <sup>3</sup> |           |          |                   |           |        |                       |          |                      |           |          |                       |          |          |          |          |
| n (%)                                                      |                                                        |    |           | P value <sup>4</sup>                       |           |          |                   |           |        |                       |          |                      |           |          |                       |          |          |          |          |
|                                                            |                                                        |    |           | n (%)                                      |           |          |                   |           |        |                       |          |                      |           |          |                       |          |          |          |          |
| Owners perception of their animal ability to self-regulate |                                                        |    |           |                                            |           |          |                   |           |        |                       |          |                      |           |          |                       |          |          |          |          |
|                                                            |                                                        |    |           | C'sV = 0.133                               |           |          | C'sV = 0.149      |           |        | C'sV = 0.208          |          | C'sV = 0.108         |           |          | C'sV = 0.102          |          |          |          |          |
|                                                            |                                                        |    |           | P = 0.714                                  |           |          | P = 0.062         |           |        | P = 0.004             |          | P = 0.532            |           |          | P = 0.652             |          |          |          |          |
| 1                                                          | Pet cats can get all the exercise they need themselves | SA | 84 (21.1) | 21(25.0)                                   | 45 (53.6) | 18(21.4) | 51(60.7)          | 29 (34.5) | 4(4.8) | 73(86.9)              | 11(13.1) | 41(48.8)             | 25 (29.8) | 14(16.7) | 4(4.7)                | 35(41.7) | 16(19.0) | 5(6.0)   | 28(33.3) |
|                                                            |                                                        | A  | 142(35.7) | 46(32.4)                                   | 76(53.5)  | 20(14.1) | 96(67.6)          | 43(30.3)  | 3(2.1) | 131(92.2)             | 11(7.8)  | 75(52.8)             | 37(26.0)  | 16(11.3) | 14(9.9)               | 63(44.4) | 33(23.2) | 16(11.3) | 30(21.1) |
|                                                            |                                                        | N  | 77(19.3)  | 32(41.5)                                   | 33(42.9)  | 12(15.6) | 36(46.7)          | 40(52.0)  | 1(1.3) | 59(76.6)              | 18(23.4) | 41(53.2)             | 25(32.5)  | 9(11.7)  | 2(2.6)                | 40(52.0) | 14(18.2) | 6(7.8)   | 17(22.0) |
|                                                            |                                                        | SD | 33(8.3)   | 13(39.4)                                   | 15(45.4)  | 5(15.2)  | 18(54.5)          | 15(45.5)  | 0(0.0) | 23(69.7)              | 10(30.3) | 12(36.4)             | 14(42.4)  | 5(15.1)  | 2(6.1)                | 18(54.6) | 7(21.2)  | 4(12.1)  | 4(12.1)  |

|                                                   |                                                                                   |       |           |           |           |           |              |           |         |              |          |              |           |          |          |              |          |          |              |
|---------------------------------------------------|-----------------------------------------------------------------------------------|-------|-----------|-----------|-----------|-----------|--------------|-----------|---------|--------------|----------|--------------|-----------|----------|----------|--------------|----------|----------|--------------|
| 2                                                 | Pet cats can regulate their own physical activity /daily exercise to keep healthy | D     | 41(10.3)  | 14(34.1)  | 20(48.8)  | 7(17.1)   | 23(56.1)     | 15(36.6)  | 3(7.3)  | 34(82.9)     | 7(17.1)  | 19(46.4)     | 11(26.8)  | 8(19.5)  | 3(7.3)   | 18(43.9)     | 10(24.4) | 5(12.2)  | 8(19.5)      |
|                                                   |                                                                                   | NS    | 21(5.3)   | 7(33.3)   | 11(52.4)  | 3(14.3)   | 12(57.1)     | 9(42.9)   | 0(0.0)  | 19(90.5)     | 2(9.5)   | 14(66.7)     | 4(19.0)   | 2(9.5)   | 1(4.8)   | 9(42.9)      | 4(19.0)  | 1(4.8)   | 7(33.3)      |
|                                                   |                                                                                   | Total | 398(100)  | 133(33.4) | 200(50.3) | 65(16.3)  | 236(59.3)    | 151(37.9) | 11(2.8) | 339(85.2)    | 59(14.8) | 202(50.8)    | 116(29.1) | 53(13.6) | 26(6.5)  | 183(46.0)    | 84(21.1) | 37(9.3)  | 94(23.6)     |
|                                                   |                                                                                   |       |           |           |           |           | C'sV = 0.138 |           |         | C'sV = 0.135 |          | C'sV = 0.176 |           |          |          | C'sV = 0.120 |          |          | C'sV = 0.119 |
|                                                   |                                                                                   |       |           |           |           |           | P = 0.125    |           |         | P = 0.688    |          | P = 0.031    |           |          |          | P = 0.310    |          |          | P = 0.317    |
|                                                   |                                                                                   | SA    | 49(12.3)  | 14(28.6)  | 24 (49.0) | 11(22.4)  | 36(73.5)     | 11(22.4)  | 2(4.1)  | 38(77.5)     | 11(22.5) | 23(47.0)     | 13(26.5)  | 10(20.4) | 3(6.1)   | 20(40.8)     | 10(20.4) | 4(8.2)   | 15(30.6)     |
|                                                   |                                                                                   | A     | 154(38.7) | 47(30.5)  | 83(53.9)  | 24(15.6)  | 87(56.5)     | 62(40.3)  | 5(3.2)  | 140(90.9)    | 14(9.1)  | 81(52.6)     | 43(27.9)  | 14(9.1)  | 16(10.4) | 64(41.5)     | 38(24.7) | 12(7.8)  | 40(26.0)     |
|                                                   |                                                                                   | N     | 92(23.1)  | 29(31.5)  | 49(53.3)  | 14(15.2)  | 51(55.4)     | 39(42.4)  | 2(2.2)  | 77(83.7)     | 15(16.3) | 48(52.2)     | 30(32.6)  | 11(12.0) | 3(3.2)   | 46(50.0)     | 17(18.5) | 10(10.8) | 19(20.7)     |
|                                                   |                                                                                   | SD    | 39(9.8)   | 19(48.7)  | 12(30.8)  | 8(20.5)   | 22(56.4)     | 16(41.0)  | 1(2.6)  | 31(79.5)     | 8(20.5)  | 21(53.8)     | 11(28.2)  | 6(15.4)  | 1(2.6)   | 23(59.0)     | 6(15.4)  | 3(7.7)   | 7(17.9)      |
|                                                   |                                                                                   | D     | 49(12.3)  | 22(44.9)  | 21(42.9)  | 6(12.2)   | 31(63.3)     | 17(34.7)  | 1(2.0)  | 38(77.5)     | 11(22.5) | 23(46.9)     | 14(28.6)  | 11(22.5) | 1(2.0)   | 22(44.9)     | 12(24.5) | 8(16.3)  | 7(14.3)      |
| 3                                                 | Pet cats can regulate themselves on how much they need to eat daily               | NS    | 15(3.8)   | 2(13.3)   | 11(73.34) | 2(13.3)   | 9(60.0)      | 6(40.0)   | 0(0.0)  | 15(100)      | 0(0.0)   | 6(40.0)      | 5(33.4)   | 2(13.3)  | 2(13.3)  | 8(53.3)      | 1(6.7)   | 0(0.0)   | 6(40.0)      |
|                                                   |                                                                                   | Total | 398(100)  | 133(33.4) | 200(50.3) | 65(16.3)) | 236(59.3)    | 151(37.9) | 11(2.8) | 339(85.2)    | 59(14.8) | 202(50.8)    | 116(29.1) | 53(13.6) | 26(6.5)  | 183(46.0)    | 84(21.1) | 37(9.3)  | 94(23.6)     |
|                                                   |                                                                                   |       |           |           |           |           | C'sV = 0.118 |           |         | C'sV = 0.127 |          | C'sV = 0.137 |           |          |          | C'sV = 0.119 |          |          | C'sV = 0.102 |
|                                                   |                                                                                   |       |           |           |           |           | P = 0.349    |           |         | P = 0.232    |          | P = 0.191    |           |          |          | P = 0.317    |          |          | P = 0.647    |
|                                                   |                                                                                   | SA    | 30(7.5)   | 7(23.3)   | 15(50.0)  | 8(26.7)   | 20(66.7)     | 8(26.6)   | 2(6.7)  | 23(76.7)     | 7(23.3)  | 13(43.3)     | 9(30.0)   | 5(16.7)  | 3(10.0)  | 16(53.3)     | 4(13.3)  | 0(0.0)   | 10(33.4)     |
|                                                   |                                                                                   | A     | 130(32.7) | 37(28.5)  | 74(56.9)  | 19(14.6)  | 73(56.1)     | 56(43.1)  | 1(0.8)  | 116(89.2)    | 14(10.8) | 78(60.0)     | 34(26.1)  | 10(7.7)  | 8(6.2)   | 63(48.5)     | 27(20.8) | 11(8.4)  | 29(22.3)     |
|                                                   |                                                                                   | N     | 67(16.8)  | 29(43.3)  | 28(41.8)  | 10(14.9)  | 37(55.2)     | 28(41.8)  | 2(3.0)  | 55(82.1)     | 12(17.9) | 35(52.2)     | 21(31.3)  | 8(12.0)  | 3(4.5)   | 29(43.3)     | 18(26.9) | 7(10.4)  | 13(19.4)     |
|                                                   |                                                                                   | SD    | 68(17.1)  | 27(39.7)  | 30(44.1)  | 11(16.2)  | 46(67.6)     | 18(26.5)  | 4(5.9)  | 55(80.9)     | 13(19.1) | 25(36.8)     | 24(35.3)  | 14(20.6) | 5(7.3)   | 31(45.6)     | 15(22.1) | 6(8.8)   | 16(23.5)     |
|                                                   |                                                                                   | D     | 77(19.3)  | 26(33.8)  | 37(48.0)  | 14(18.2)  | 44(57.1)     | 31(40.3)  | 2(2.6)  | 65(84.4)     | 12(15.6) | 35(45.4)     | 23(29.9)  | 14(18.2) | 5(6.5)   | 31(40.2)     | 15(19.5) | 12(15.6) | 19(24.7)     |
|                                                   |                                                                                   | NS    | 26(6.5)   | 7(26.9)   | 16(61.5)  | 3(11.6)   | 16(61.5)     | 10(38.5)  | 0(0.0)  | 25(96.2)     | 1(3.8)   | 16(61.6)     | 5(19.2)   | 3(11.5)  | 2(7.7)   | 13(50.0)     | 5(19.2)  | 1(3.9)   | 7(26.9)      |
| Owners perception of cats physical activity needs |                                                                                   | Total | 398(100)  | 133(33.4) | 200(50.3) | 65(16.3)  | 236(59.3)    | 151(37.9) | 11(2.8) | 339(85.2)    | 59(14.8) | 202(50.8)    | 116(29.1) | 53(13.6) | 26(6.5)  | 183(46.0)    | 84(21.1) | 37(9.3)  | 94(23.6)     |
|                                                   |                                                                                   |       |           |           |           |           | C'sV = 0.097 |           |         | C'sV = 0.128 |          | C'sV = 0.145 |           |          |          | C'sV = 0.126 |          |          | C'sV = 0.148 |
|                                                   |                                                                                   |       |           |           |           |           | P = 0.676    |           |         | P = 0.227    |          | P = 0.126    |           |          |          | P = 0.218    |          |          | P = 0.036    |

|   |                                                                                 |                |                              |                              |                             |                                      |                                      |                                     |
|---|---------------------------------------------------------------------------------|----------------|------------------------------|------------------------------|-----------------------------|--------------------------------------|--------------------------------------|-------------------------------------|
|   | Pet cats need to be kept active by their owner to keep them fit                 | SA 28(11.6)    | 5(17.9) 18(64.2) 5(17.9)     | 15(53.6) 11(39.3) 2(7.1)     | 22(78.6) 6(21.4)            | 15(53.6) 5 (17.9) 7(25.0) 1(3.5)     | 12(42.9) 3(10.7) 4(14.3) 9(32.1)     |                                     |
|   |                                                                                 | A 143(26.6)    | 50(35.0) 70(48.9) 23(16.1)   | 76(53.1) 61(42.7) 6(4.2)     | 118(82.5) 25(17.5)          | 69(28.2) 51(35.7) 18(12.6) 5(3.5)    | 82(57.3) 20(14.0) 13(9.1) 28(19.6)   |                                     |
|   |                                                                                 | N 104(19.3)    | 39(37.5) 52(50.0) 13(12.5)   | 63(60.6) 38(36.5) 3(2.9)     | 85(81.7) 19(18.3)           | 51(49.0) 32(30.8) 14(13.5) 7(6.7)    | 42(40.4) 26(25.0) 13(12.5) 23(22.1)  |                                     |
|   |                                                                                 | SD 36(11.6)    | 11(30.6) 17(47.2) 8(22.2)    | 20(55.6) 16(44.4) 0(0.0)     | 33(91.7) 3(8.3)             | 16(44.5) 12(33.3) 3(8.3) 5(13.9)     | 16(44.4) 9(25.0) 4(11.1) 7(19.5)     |                                     |
|   |                                                                                 | D 80(26.4)     | 27(33.7) 38(47.5) 15(18.8)   | 57(71.2) 23(28.8) 0(0.0)     | 75(93.7) 5(6.3)             | 47(58.7) 15(18.7) 11(13.8) 7(8.8)    | 29(36.2) 23(28.8) 3(3.8) 25(31.2)    |                                     |
|   |                                                                                 | NS 7(4.5)      | 1(14.3) 5(71.4) 1(14.3)      | 5(71.4) 2(28.6) 0(0.0)       | 6(85.7) 1(14.3)             | 4(57.1) 1(14.3) 1(14.3) 1(14.3)      | 2(28.6) 3(42.9) 0(0.0) 2(28.5)       |                                     |
|   |                                                                                 | Total 398(100) | 133(33.4) 200(50.3) 65(16.3) | 236(59.3) 151(37.9) 11(2.8)  | 339(85.2) 59(14.8)          | 202(50.8) 116(29.1) 53(13.6) 26(6.5) | 183(46.0) 84(21.1) 37(9.3) 94(23,6)  |                                     |
|   |                                                                                 |                | C'sV = 0.147                 | C'sV = 0.081                 | C'sV = 0.078                | C'sV = 0.130                         | C'sV = 0.137                         |                                     |
|   |                                                                                 |                | P = 0.072                    | P = 0.871                    | P = 0.790                   | P = 0.166                            | P = 0.097                            |                                     |
| 2 | Pet cats need to be provided with less physical exercise as compare to pet dogs | SA 43(10.8)    |                              |                              |                             |                                      |                                      |                                     |
|   |                                                                                 | A 157(39.4)    | 16(37.2) 21(48.8) 6(14.0)    | 21(48.8) 21(48.8) 1(2.4)     | 34(79.1) 9(20.9)            | 21(48.8) 14(32.6) 4(9.3) 4(9.3)      | 18(41.8) 9(21.0) 4(9.3) 12(27.9)     |                                     |
|   |                                                                                 | N 63(15.8)     | 51(32.5) 74(47.1) 32(20.4)   | 94(59.9) 58(36.9) 5(3.2)     | 137(87.3) 20(12.7)          | 86(54.8) 41(26.1) 17(10.8) 13(8.3)   | 67(42.7) 29(18.5) 14(8.9) 47(29.9)   |                                     |
|   |                                                                                 | SD 37(9.3)     | 17(27.0) 36(57.1) 10(15.9)   | 42(66.7) 19(30.1) 2(3.2)     | 52(82.5) 11(17.5)           | 27(42.9) 26(41.2) 7(11.1) 3(4.8)     | 33(52.4) 11(17.5) 7(11.1) 12(19.0)   |                                     |
|   |                                                                                 | D 69(17.3)     | 14(37.8) 18(48.7) 5(13.5)    | 23(62.2) 14(37.8) 0(0.0)     | 31(83.8) 6(16.2)            | 19(51.4) 10(27.0) 8(21.6) 0(0.0)     | 22(59.5) 9(24.3) 2(5.4) 4(10.8)      |                                     |
|   |                                                                                 |                | 29(42.0) 37(53.6) 3(4.4)     | 39(56.5) 28(40.6) 2(2.9)     | 60(87.0) 9(13.0)            | 38(55.1) 16(23.2) 13(18.8) 2(2.9)    | 34(49.3) 18(26.1) 9(13.0) 8(11.6)    |                                     |
|   |                                                                                 | NS 29(7.3)     | 6(20.7) 14(48.3) 9(31.0)     | 17(58.6) 11(37.9) 1(3.5)     | 25(86.2) 4(13.8)            | 11(37.9) 9(31.0) 5(17.3) 4(13.8)     | 9(31.0) 8(27.6) 1(3.5) 11(37.9)      |                                     |
|   |                                                                                 |                | Total 398(100)               | 133(33.4) 200(50.3) 65(16.3) | 236(59.3) 151(37.9) 11(2.8) | 339(85.2) 59(14.8)                   | 202(50.8) 116(29.1) 53(13.6) 26(6.5) | 183(46.0) 84(21.1) 37(9.3) 94(23,6) |
|   |                                                                                 |                | C'sV = 0.103                 | C'sV = 0.114                 | C'sV = 0.074                | C'sV = 0.100                         | C'sV = 0.129                         |                                     |
|   |                                                                                 |                | P = 0.589                    | P = 0.413                    | P = 0.825                   | P = 0.675                            | P = 0.173                            |                                     |
| 3 | It is difficult to get pet cats to exercise                                     | SA 46(11.6)    | 13(28.2) 24(52.2) 9(19.6)    | 26(56.5) 20(43.5) 0(0.0)     | 40(87.0) 6(13.0)            | 22(47.8) 17(37.0) 5(10.9) 2(4.3)     | 19(41.3) 8(17.4) 2(4.3) 17(37.0)     |                                     |
|   |                                                                                 | A 106(26.6)    | 42(39.6) 46(43.4) 18(17.0)   | 57(53.8) 47(44.3) 2(1.9)     | 91(85.8) 15(14.2)           | 57(53.8) 28(26.4) 12(11.3) 9(8.5)    | 47(44.3) 20(18.9) 14(13.2) 25(23.6)  |                                     |
|   |                                                                                 | N 77(19.3)     | 31(40.3) 36(46.7) 10(13.00)  | 49(63.6) 23(29.9) 5(6.5)     | 67(87.0) 10(13.0)           | 38(49.3) 24(31.2) 10(13.0) 5(6.5)    | 36(46.7) 14(18.2) 12(15.6) 15(19.5)  |                                     |
|   |                                                                                 | SD 46(11.6)    | 11(23.9) 28(60.9) 7(15.2)    | 28(60.8) 17(37.0) 10(22.2)   | 36(78.3) 10(21.4)           | 25(54.4) 14(30.4) 6(13.0) 1(2.2)     | 27(58.7) 10(21.7) 1(2.2) 8(17.4)     |                                     |
|   |                                                                                 | D 105(26.4)    | 31(29.5) 57(54.3) 15(16.2)   | 65(61.9) 38(36.2) 2(1.9)     | 90(85.7) 15(14.3)           | 53(50.5) 30(28.6) 16(15.2) 6(5.7)    | 47(44.7) 28(26.7) 7(6.7) 23(21.9)    |                                     |
|   |                                                                                 | NS 18(4.5)     | 5(27.8) 9(50.0) 4(22.2)      | 11(61.1) 6(33.3) 1(5.6)      | 15(83.3) 3(16.7)            | 7(38.9) 3(16.7) 5(27.7) 3(16.7)      | 7(38.9) 4(22.2) 1(5.6) 6(33.3)       |                                     |
|   |                                                                                 | Total 398(100) | 133(33.4) 200(50.3) 65(16.3) | 236(59.3) 151(37.9) 11(2.8)  | 339(85.2) 59(14.8)          | 202(50.8) 116(29.1) 53(13.6) 26(6.5) | 183(46.0) 84(21.1) 37(9.3) 94(23,6)  |                                     |



|                                                                           |                                                                                                 |                |                              |                             |                           |                                      |                                     |
|---------------------------------------------------------------------------|-------------------------------------------------------------------------------------------------|----------------|------------------------------|-----------------------------|---------------------------|--------------------------------------|-------------------------------------|
| 4                                                                         | The amount of exercise a pet cat needs depends on its age, body condition and medical condition |                | C'sV = 0.118<br>P = 0.354    | C'sV = 0.190<br>P = 0.001   | C'sV = 0.169<br>P = 0.045 | C'sV = 0.164<br>P = 0.006            | C'sV = 0.129<br>P = 0.176           |
|                                                                           |                                                                                                 | SA 174(43.7)   | 64(36.8) 78(44.8) 32(18.4)   | 100(57.5) 68(39.1) 6(3.4)   | 137(78.7) 37(21.3)        | 76(43.7) 68(39.1) 21(12.0) 9(5.2)    | 87(50.0) 28(16.1) 21(12.1) 38(21.8) |
|                                                                           |                                                                                                 | A 164(41.2)    | 46(28.1) 94(57.3) 24(14.6)   | 95(57.9) 68(41.5) 1(0.6)    | 148(90.2) 16(9.8)         | 92(56.1) 42(25.6) 19(11.6) 11(6.7)   | 76(46.4) 34(20.7) 10(6.1) 44(26.8)  |
|                                                                           |                                                                                                 | N 24(6.0)      | 7(29.2) 13(54.2) 4(16.6)     | 19(79.2) 5(20.8) 0(0.0)     | 22(91.7) 2(8.3)           | 17(70.9) 2(8.3) 3(12.5) 2(8.3)       | 8(33.3) 10(41.7) 2(8.3) 4(16.7)     |
|                                                                           |                                                                                                 | SD 8(2.0)      | 4(50.0) 3(37.5) 1(12.5)      | 3(37.5) 4(50.0) 1(12.5)     | 7(87.5) 1(12.5)           | 3(37.5) 2(25.0) 2(25.0) 1(12.5)      | 3(37.5) 3(37.5) 1(12.5) 1(12.5)     |
|                                                                           |                                                                                                 | D 10(2.5)      | 6(60.0) 4(40.0) 0(0.0)       | 9(90.0) 1(10.0) 0(0.0)      | 8(80.0) 2(20.0)           | 6(60.0) 1(10.0) 2(20.0) 1(10.0)      | 4(40.0) 3(30.0) 0(0.0) 3(30.0)      |
|                                                                           |                                                                                                 | NS 18(4.5)     | 6(33.3) 8(44.5) 4(22.2)      | 10(55.6) 5(27.8) 3(16.7)    | 17(94.4) 1(5.6)           | 8(44.4) 1(5.6) 7(38.9) 2(11.1)       | 5(27.8) 6(33.3) 3(16.7) 4(22.2)     |
|                                                                           |                                                                                                 | Total 398(100) | 133(33.4) 200(50.3) 65(16.3) | 236(59.3) 151(37.9) 11(2.8) | 339(85.2) 59(14.8)        | 202(50.8) 116(29.1) 53(13.6) 26(6.5) | 183(46.0) 84(21.1) 37(9.3) 94(23.6) |
| Owners perception of selected environmental factors effects on their cats |                                                                                                 |                |                              |                             |                           |                                      |                                     |
| 1                                                                         | Keeping a few cats together can assure that each cat is well exercised                          |                | C'sV = 0.110<br>P = 0.475    | C'sV = 0.155<br>P = 0.038   | C'sV = 0.188<br>P = 0.015 | C'sV = 0.188<br>P = 0.015            | C'sV = 0.117<br>P = 0.364           |
|                                                                           |                                                                                                 | SA 26(6.5)     | 9(34.6) 10(38.5) 7(26.9)     | 20(76.9) 5(19.2) 1(3.9)     | 23(88.5) 3(11.5)          | 12(46.1) 8(30.8) 4(15.4) 2(7.7)      | 5(19.2) 6(23.1) 4(15.4) 11(42.3)    |
|                                                                           |                                                                                                 | A 105(26.4)    | 34(32.4) 53(50.5) 18(17.1)   | 51(48.6) 50(47.6) 4(3.8)    | 90(85.7) 15(14.3)         | 51(48.6) 35(33.3) 14(13.3) 5(4.8)    | 54(51.4) 19(18.1) 10(9.5) 22(21.0)  |
|                                                                           |                                                                                                 | N 95(23.9)     | 30(31.6) 49(51.6) 16(16.8)   | 57(60.0) 38(40.0) 0(0.0)    | 85(89.5) 10(10.5)         | 55(57.9) 25(26.3) 10(10.5) 5(5.3)    | 44(46.3) 25(26.3) 6(6.3) 20(21.1)   |
|                                                                           |                                                                                                 | SD 24(6.0)     | 11(45.8) 11(45.8) 2(8.4)     | 13(54.2) 11(45.8) 0(0.0)    | 15(62.5) 9(37.5)          | 14(58.3) 6(25.0) 4(16.7) 0(0.0)      | 13(54.1) 6(25.0) 1(4.2) 4(16.7)     |
|                                                                           |                                                                                                 | D 64(16.1)     | 27(42.2) 30(46.9) 7(10.9)    | 46(71.9) 15(23.4) 3(4.7)    | 51(79.7) 13(20.3)         | 33(51.6) 22(34.4) 5(7.8) 4(6.2)      | 29(45.3) 13(20.3) 8(12.5) 14(21.9)  |
|                                                                           |                                                                                                 | NS 84(21.1)    | 22(26.2) 47(55.9) 15(17.9)   | 49(58.3) 32(38.1) 3(3.6)    | 75(89.3) 9(10.7)          | 37(44.1) 20(23.8) 17(20.2) 10(11.9)  | 38(45.2) 15(17.9) 8(9.5) 23(27.4)   |
|                                                                           |                                                                                                 | Total 398(100) | 133(33.4) 200(50.3) 65(16.3) | 236(59.3) 151(37.9) 11(2.8) | 339(85.2) 59(14.8)        | 202(50.8) 116(29.1) 53(13.6) 26(6.5) | 183(46.0) 84(21.1) 37(9.3) 94(23.6) |
| 2                                                                         | Keeping a few cats together can lead to stress to some cats                                     |                | C'sV = 0.092<br>P = 0.745    | C'sV = 0.108<br>P = 0.510   | C'sV = 0.087<br>P = 0.710 | C'sV = 0.151<br>P = 0.026            | C'sV = 0.097<br>P = 0.734           |
|                                                                           |                                                                                                 | SA 45(6.5)     | 18(40.0) 19(42.2) 8(17.8)    | 34(75.6) 10(22.2) 1(2.2)    | 37(82.2) 8(17.8)          | 20(44.5) 14(31.1) 10(22.2) 1(2.2)    | 22(48.9) 10(22.2) 3(6.7) 10(22.2)   |
|                                                                           |                                                                                                 | A 152(26.4)    | 51(33.5) 81(53.3) 20(13.2)   | 92(60.5) 57(37.5) 3(2.0)    | 129(84.9) 23(15.1)        | 73(48.0) 53(34.9) 16(10.5) 10(6.6)   | 65(42.8) 34(22.4) 18(11.8) 35(23.0) |
|                                                                           |                                                                                                 | N 70(23.9)     | 24(34.3) 36(51.4) 10(14.3)   | 35(50.0) 33(47.1) 2(2.9)    | 62(88.6) 8(11.4)          | 41(58.6) 17(24.3) 8(11.4) 4(5.7)     | 39(55.8) 12(17.1) 7(10.0) 12(17.1)  |
|                                                                           |                                                                                                 |                |                              |                             |                           |                                      |                                     |
|                                                                           |                                                                                                 |                |                              |                             |                           |                                      |                                     |
|                                                                           |                                                                                                 |                |                              |                             |                           |                                      |                                     |

|           |                                                                          |                |                              |                             |                    |                                      |                                     |              |
|-----------|--------------------------------------------------------------------------|----------------|------------------------------|-----------------------------|--------------------|--------------------------------------|-------------------------------------|--------------|
| 3         | Keeping cat(s) with pet dogs can assure that pet cats are well exercised | SD 24(6.0)     | 8(33.3) 12(50.0) 4(16.7)     | 13(54.2) 10(41.7) 1(4.2)    | 21(87.5) 3(12.5)   | 8(33.4) 11(45.8) 5(20.8) 0(0.0)      | 13(54.2) 5(20.8) 1(4.2) 5(20.8)     |              |
|           |                                                                          | D 30(16.1)     | 12(40.0) 12(40.0) 6(20.0)    | 19(63.4) 10(33.3) 1(3.3)    | 23(76.7) 7(23.3)   | 18(60.0) 9(30.0) 1(3.3) 2(6.7)       | 10(33.4) 7(23.3) 4(13.3) 9(30.0)    |              |
|           |                                                                          | NS 77(21.1)    | 20(26.0) 40(51.9) 17(22.1)   | 43(55.8) 31(40.3) 3(3.9)    | 67(87.0) 10(13.0)  | 42(54.5) 12(15.6) 14(18.2) 9(11.7)   | 34(14.1) 16(20.8) 4(5.2) 23(29.9)   |              |
|           |                                                                          | Total 398(100) | 133(33.4) 200(50.3) 65(16.3) | 236(59.3) 151(37.9) 11(2.8) | 339(85.2) 59(14.8) | 202(50.8) 116(29.1) 53(13.6) 26(6.5) | 183(46.0) 84(21.1) 37(9.3) 94(23.6) |              |
|           |                                                                          | C'sV = 0.134   |                              |                             |                    |                                      |                                     | C'sV = 0.121 |
|           |                                                                          | P = 0.157      |                              |                             |                    |                                      |                                     | P = 0.288    |
|           |                                                                          | C'sV = 0.118   |                              |                             |                    |                                      |                                     | C'sV = 0.129 |
|           |                                                                          | P = 0.348      |                              |                             |                    |                                      |                                     | P = 0.173    |
|           |                                                                          | C'sV = 0.240   |                              |                             |                    |                                      |                                     | C'sV = 0.169 |
|           |                                                                          | P < 0.001      |                              |                             |                    |                                      |                                     | P = 0.004    |
| 4         | Pet cat(s) are happier being kept outdoors                               | SA 22(5.5)     | 7(31.8) 10(45.5) 5(22.7)     | 15(68.2) 6(27.3) 1(4.5)     | 17(77.3) 5(22.7)   | 11(50.0) 8(36.4) 3(13.6) 0(0.0)      | 7(31.8) 3(13.6) 4(18.2) 8(36.4)     |              |
|           |                                                                          | A 93(23.4)     | 36(38.7) 45(48.4) 12(12.9)   | 55(59.1) 34(36.6) 4(4.3)    | 72(77.4) 21(22.6)  | 38(40.9) 38(40.9) 13(13.9) 4(4.3)    | 46(49.5) 21(22.6) 11(11.8) 15(16.1) |              |
|           |                                                                          | N 128(32.2)    | 40(31.3) 74(57.8) 14(10.9)   | 69(53.9) 57(44.5) 2(1.6)    | 115(89.8) 13(10.2) | 71(55.5) 35(27.3) 15(11.7) 7(5.5)    | 67(52.3) 27(21.1) 10(7.8) 24(18.8)  |              |
|           |                                                                          | SD 52(13.1)    | 26(50.0) 18(34.6) 8(15.4)    | 32(61.5) 18(34.6) 2(3.9)    | 42(80.8) 10(19.2)  | 24(46.2) 18(34.6) 6(11.5) 4(7.7)     | 22(42.3) 11(21.1) 7(13.5) 12(23.1)  |              |
|           |                                                                          | D 84(21.1)     | 15(17.9) 48(57.1) 21(25.0)   | 52(61.9) 30(35.7) 2(2.4)    | 77(91.7) 7(8.3)    | 51(60.7) 15(17.9) 9(10.7) 9(10.7)    | 38(45.2) 13(15.5) 5(6.0) 28(33.3)   |              |
|           |                                                                          | NS 19(4.8)     | 9(47.4) 5(26.3) 5(26.3)      | 13(68.4) 6(31.6) 0(0.0)     | 16(84.2) 3(15.8)   | 7(36.9) 2(10.5) 8(42.1) 2(10.5)      | 3(15.8) 9(47.4) 0(0.0) 7(36.8)      |              |
|           |                                                                          | Total 398(100) | 133(33.4) 200(50.3) 65(16.3) | 236(59.3) 151(37.9) 11(2.8) | 339(85.2) 59(14.8) | 202(50.8) 116(29.1) 53(13.6) 26(6.5) | 183(46.0) 84(21.1) 37(9.3) 94(23.6) |              |
|           |                                                                          | C'sV = 0.188   |                              |                             |                    |                                      |                                     | C'sV = 0.160 |
|           |                                                                          | P = 0.002      |                              |                             |                    |                                      |                                     | P = 0.010    |
|           |                                                                          | C'sV = 0.090   |                              |                             |                    |                                      |                                     | C'sV = 0.169 |
| P = 0.774 |                                                                          |                |                              |                             |                    | P = 0.004                            |                                     |              |
| 4         | Pet cat(s) are happier being kept outdoors                               | SA 22(5.5)     | 7(31.8) 10(45.5) 5(22.7)     | 15(68.2) 6(27.3) 1(4.5)     | 17(77.3) 5(22.7)   | 11(50.0) 8(36.4) 3(13.6) 0(0.0)      | 7(31.8) 3(13.6) 4(18.2) 8(36.4)     |              |
|           |                                                                          | A 93(23.4)     | 36(38.7) 45(48.4) 12(12.9)   | 55(59.1) 34(36.6) 4(4.3)    | 72(77.4) 21(22.6)  | 38(40.9) 38(40.9) 13(13.9) 4(4.3)    | 46(49.5) 21(22.6) 11(11.8) 15(16.1) |              |
|           |                                                                          | N 128(32.2)    | 40(31.3) 74(57.8) 14(10.9)   | 69(53.9) 57(44.5) 2(1.6)    | 115(89.8) 13(10.2) | 71(55.5) 35(27.3) 15(11.7) 7(5.5)    | 67(52.3) 27(21.1) 10(7.8) 24(18.8)  |              |
|           |                                                                          | SD 52(13.1)    | 26(50.0) 18(34.6) 8(15.4)    | 32(61.5) 18(34.6) 2(3.9)    | 42(80.8) 10(19.2)  | 24(46.2) 18(34.6) 6(11.5) 4(7.7)     | 22(42.3) 11(21.1) 7(13.5) 12(23.1)  |              |
|           |                                                                          | D 84(21.1)     | 15(17.9) 48(57.1) 21(25.0)   | 52(61.9) 30(35.7) 2(2.4)    | 77(91.7) 7(8.3)    | 51(60.7) 15(17.9) 9(10.7) 9(10.7)    | 38(45.2) 13(15.5) 5(6.0) 28(33.3)   |              |
|           |                                                                          | NS 19(4.8)     | 9(47.4) 5(26.3) 5(26.3)      | 13(68.4) 6(31.6) 0(0.0)     | 16(84.2) 3(15.8)   | 7(36.9) 2(10.5) 8(42.1) 2(10.5)      | 3(15.8) 9(47.4) 0(0.0) 7(36.8)      |              |
|           |                                                                          | Total 398(100) | 133(33.4) 200(50.3) 65(16.3) | 236(59.3) 151(37.9) 11(2.8) | 339(85.2) 59(14.8) | 202(50.8) 116(29.1) 53(13.6) 26(6.5) | 183(46.0) 84(21.1) 37(9.3) 94(23.6) |              |
|           |                                                                          | C'sV = 0.094   |                              |                             |                    |                                      |                                     | C'sV = 0.102 |
|           |                                                                          | P = 0.715      |                              |                             |                    |                                      |                                     | P = 0.647    |
|           |                                                                          | C'sV = 0.077   |                              |                             |                    |                                      |                                     | C'sV = 0.104 |
| P = 0.912 |                                                                          |                |                              |                             |                    | P = 0.608                            |                                     |              |

|   |                                           |                |                              |                             |                    |                                      |                                     |
|---|-------------------------------------------|----------------|------------------------------|-----------------------------|--------------------|--------------------------------------|-------------------------------------|
| 5 | Pet cat(s) are happier being kept indoors | SA 26(6.5)     | 10(38.5) 12 (46.1) 4(13.4)   | 18(69.2) 7(26.9) 1(3.9)     | 22(84.6) 4(15.4)   | 14(53.8) 8(30.8) 2(7.7) 2(7.7)       | 11(42.3) 6(23.1) 3(11.5) 6(23.1)    |
|   |                                           | A 101(25.4)    | 37(36.6) 48(47.5) 16(15.9)   | 62(61.4) 36(35.6) 3(3.0)    | 83(82.2) 18(17.8)  | 48(47.5) 36(35.6) 10(9.9) 7(6.9)     | 51(50.5) 22(21.8) 10(9.9) 18(17.8)  |
|   |                                           | N 136(34.2)    | 40(29.4) 75(55.1) 21(15.4)   | 80(58.8) 53(39.0) 3(2.2)    | 117(86.0) 19(14.0) | 74(54.4) 38(27.9) 17(12.5) 7(5.2)    | 66(48.5) 25(18.4) 13(9.6) 32(23.5)  |
|   |                                           | SD 49(12.3)    | 20(40.8) 20(40.8) 9(18.4)    | 24(49.0) 23(46.9) 2(4.1)    | 44(89.8) 5(10.2)   | 26(53.1) 10(20.4) 8(16.3) 5(10.2)    | 19(38.8) 10(20.4) 5(10.2) 15(30.6)  |
|   |                                           | D 71(17.8)     | 20(28.2) 40(56.3) 11(15.5)   | 42(59.2) 27(38.0) 2(2.8)    | 60(84.5) 11(15.5)  | 34(47.9) 21(29.6) 12(16.9) 4(5.6)    | 33(46.5) 15(21.1) 6(8.5) 17(23.9)   |
|   |                                           | NS 15(3.8)     | 6(40.0) 5(33.3) 4(26.7)      | 10(66.7) 5(33.3) 0(0.0)     | 13(86.7) 2(13.3)   | 6(40.0) 3(20.0) 5(33.3) 1(6.7)       | 3(20.0) 6(40.0) 0(0.0) 6(40.0)      |
|   |                                           | Total 398(100) | 133(33.4) 200(50.3) 65(16.3) | 236(59.3) 151(37.9) 11(2.8) | 339(85.2) 59(14.8) | 202(50.8) 116(29.1) 53(13.6) 26(6.5) | 183(46.0) 84(21.1) 37(9.3) 94(23.6) |

<sup>1</sup> SA=Strongly agree, A=Agree, N=Neutral, SA=Strongly disagree, D=Disagree, NS=Not sure.

<sup>2</sup>F= Female; M=Male; ND=Not disclosed; NR=Not related to veterinary or animal sci.; VA= Veterinary, and animal sci. related; 1-4=ISCED 2011 level 1-4; 5-6=ISCED 2011 level 5-6; 7-8=ISCED 2011 level 7-8; ND=Not disclosed; FT=Employment status - Full-time; PT= Employment status - Part-time; FTE= Full time education; UR= Unemployed, retired, or otherwise at home and not working.

<sup>3</sup>Cramer's V coefficients (C'sV) show the level of associations between respondents' opinions and the sociodemographic ordinal variables listed in the table columns. C'sV between 0.100-0.150 indicate moderate while C'sV between 0.151-0.250 indicate strong association [17].

<sup>4</sup>P values for Pearson's chi-square tests or those for Fisher Freeman Hilton exact test for the data-subsets of smaller sample size according to Cochran's condition.
